# Supplementary material
Source: MDPI journal article supplement (https://www.mdpi.com/2673-3846/2/3/24)
Supplement: s1 [file s1]

**Table S1.** Definitions of nonsustained ventricular tachycardia in existing literature.

| Citation                    | QRS Duration in Milliseconds | Number of Beats | Rate in Beats per Minute | Number of Seconds until Resolution |
|-----------------------------|------------------------------|-----------------|--------------------------|------------------------------------|
| Al-Khatib 2018 <sup>1</sup> | ≥120                         | ≥3              | >100                     | <30                                |
| Buxton 2000 <sup>2</sup>    | Not defined                  | ≥3              | >100                     | Not defined.                       |
| Doval 1996 <sup>3</sup>     | Not defined                  | ≥3              | ≥100                     | Not defined.                       |
| Katritsis 2004 <sup>4</sup> | Not defined.                 | ≥3              | >120                     | <30                                |
| Thomsen 2010 <sup>5</sup>   | Not defined.                 | ≥16 beats       | ≥125                     | <30                                |

## References

1. Al-Khatib, S.M.; Stevenson, W.G.; Ackerman, M.J.; Bryant, W.J.; Callans, D.J.; Curtis, A.B.; Deal, B.J.; Dickfeld, T.; Field, M.E.; Fonarow, G.C.; et al. 2017 AHA/ACC/HRS guideline for management of patients with ventricular arrhythmias and the prevention of sudden cardiac death: a report of the American College of Cardiology/American Heart Association Task Force on Clinical Practice Guidelines and the Heart Rhythm Society. *J. Am. Coll. Cardiol.* **2018**, e91–e220.
2. Buxton, A.E.; Duc, J.; Berger, E.E.; Torres, V. Nonsustained ventricular tachycardia. *Cardiol. Clin.* **2000**, *18*, 327–336.
3. Doval, H.C.; Nul, D.R.; Grancelli, H.O.; Varini, S.D.; Soifer, S.; Corrado, G.; Dubner, S.; Scapin, O.; Perrone, S.V. Nonsustained ventricular tachycardia in severe heart failure: independent marker of increased mortality due to sudden death. *Circulation* **1996**, *94*, 3198–3203.
4. Katritsis, D.G.; Camm, A.J. Nonsustained ventricular tachycardia: where do we stand? *Eur. Heart J.* **2004**, 1093–1099.
5. Thomsen, P.E.B.; Jons, C.; Raatikainen, M.P.; Moerch, J.R.; Hartikainen, J.; Virtanen, V.; Boland, J.; Anttonen, O.; Gang, U.J.; Hoest, N.; et al. Long-term recording of cardiac arrhythmias with an implantable cardiac monitor in patients with reduced ejection fraction after acute myocardial infarction: the Cardiac Arrhythmias and Risk Stratification After Acute Myocardial Infarction (CARISMA) study. *Circulation* **2010**, *122*, 1258–1264.
